# Supplementary material for: Dam-mediated flooding impact on outpatient attendance and diarrhoea cases in northern Ghana: a mixed methods study
Source: Springer Nature journal article supplement (doi:10.1186/s12889-022-14568-w), 2022-11-17
Supplement: MOESM2 [file 23723246]

## **Key Informant Interviews Guide**

**An assessment of flooding from dam releases and its impacts on diarrhoea disease and microbiological contamination of water sources in selected dryland areas in Northern Ghana.**

**[Introduce project objectives. Read Consent to participate and seek consent to continue]**

**Date:** \_\_\_\_ / \_\_\_\_ / \_\_\_\_      **Location:** \_\_\_\_\_

**Respondent name:** \_\_\_\_\_      **Respondent ID:** \_\_\_\_\_

**Circle the appropriate respondent**

|                                |     |
|--------------------------------|-----|
| Assembly Men/women             | AM  |
| Water Providers                | WP  |
| Property Owners (house/farms)  | PO  |
| Health Care Providers          | HCP |
| NADMO Officers                 | NO  |
| District Coordinating Director | DCD |
| Red Cross Officer              | RCO |

1. *(ALL)* - Please can you tell me some of the measures your sector/office has put in place to lessen the impact of floods on the community.
2. *(HCP)* - How do you sensitize the community members to build their resilience to health in relation to the flood?
3. *(HCP)* – Are there any key health-related issues observed in flooded communities over the past years?
4. *(HCP)* - What are some of the challenges during flooding with respect to healthcare access.
5. *(ALL)* - What are some of the emergency approaches/strategies your sector employs during the flood?
6. Please are there any gender roles associated with these strategies?
7. *(ALL)* - What are some of the constraints affecting your sector/office in deploying these strategies and measures?
8. *(ALL)* - What will be your recommendations to resolve these constraints?
9. *(ALL)* - What are some of the support your sector gives to the community members in building their capacity to cope and adapt to the flooding.
10. *(ALL)* - What strategies do you think should be done to improve community capacity in flood adaptation?
11. *(ALL)* - Please how does your office respond to damages, affected persons, and properties after the floods?
12. *(ALL)*- What will be your assessment of the community's capacity in terms of flood adaptation?
