# Supplementary material for: Dam-mediated flooding impact on outpatient attendance and diarrhoea cases in northern Ghana: a mixed methods study
Source: Springer Nature journal article supplement (doi:10.1186/s12889-022-14568-w), 2022-11-17

Monthly trend of log of diarrhoea cases by health facility from 2016 to 2020

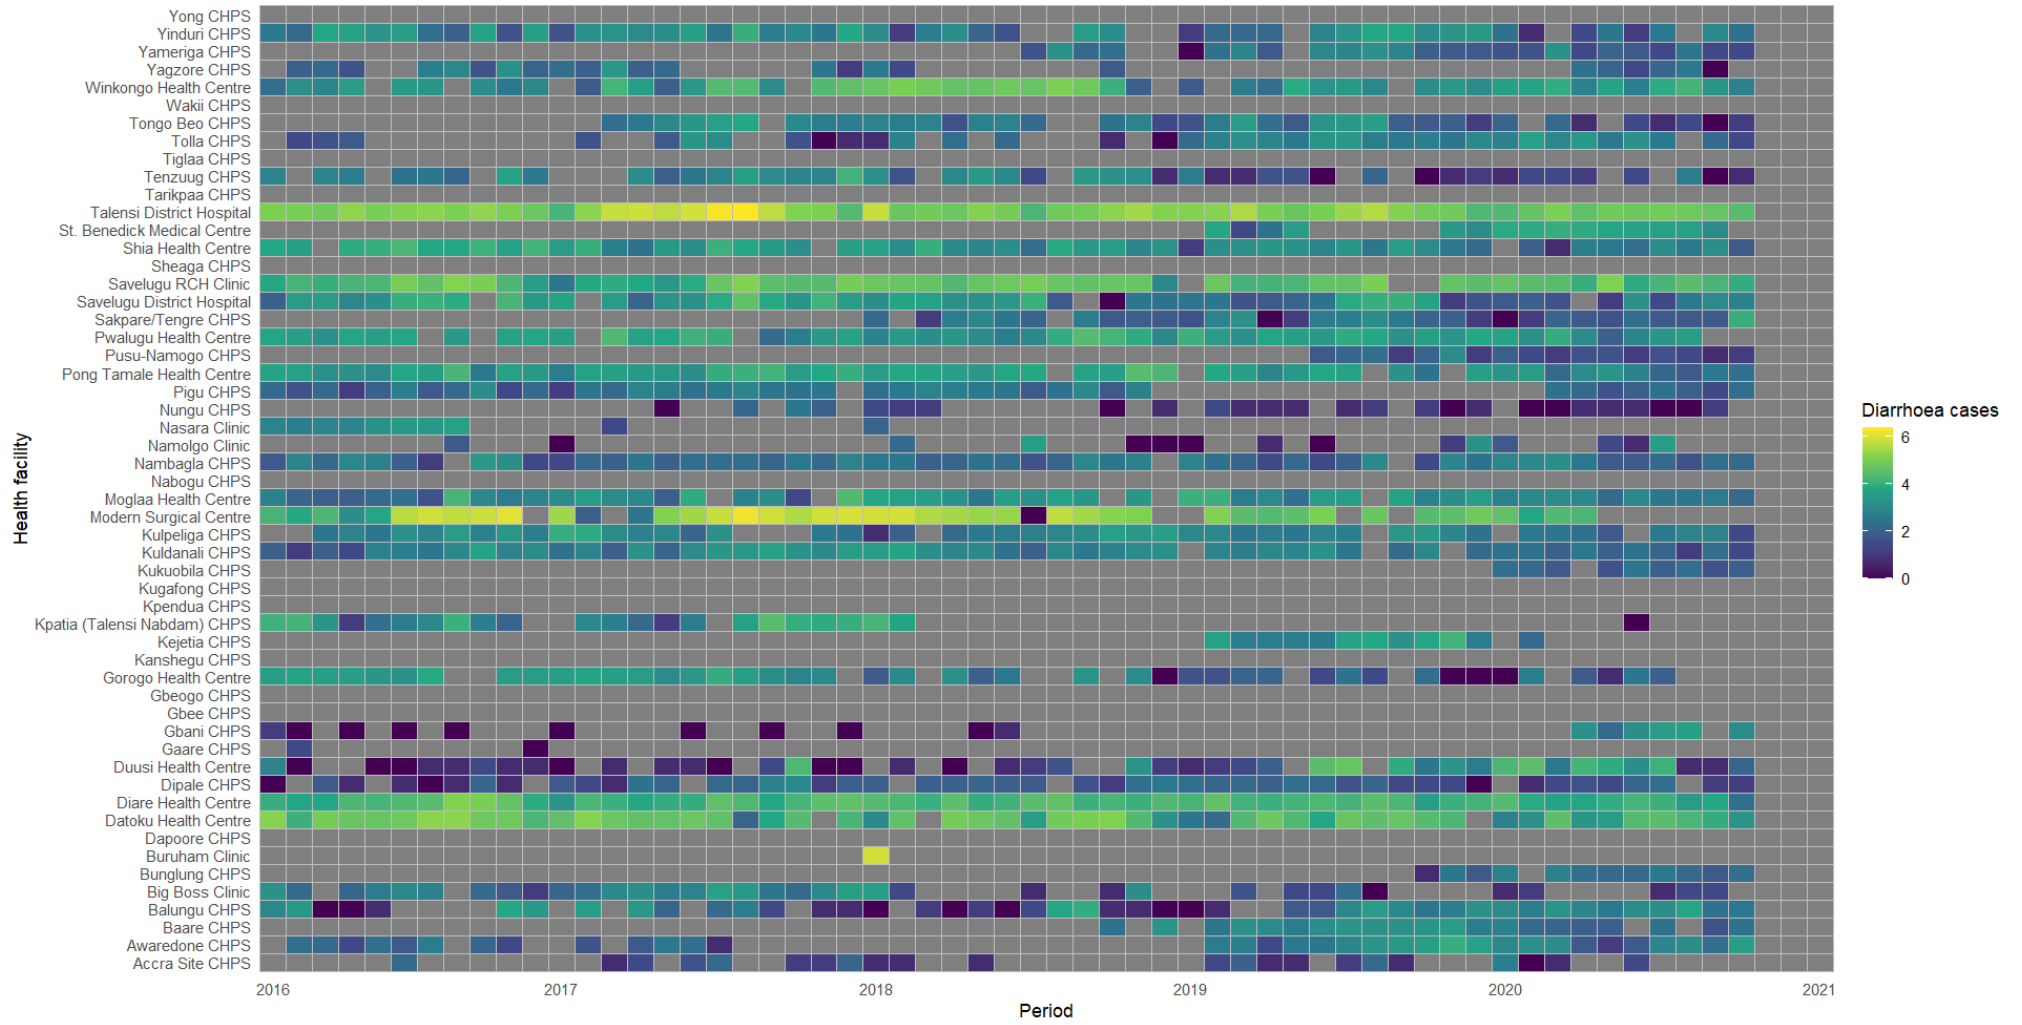

Monthly trend of log of outpatient attendance by health facility from 2016 to 2020

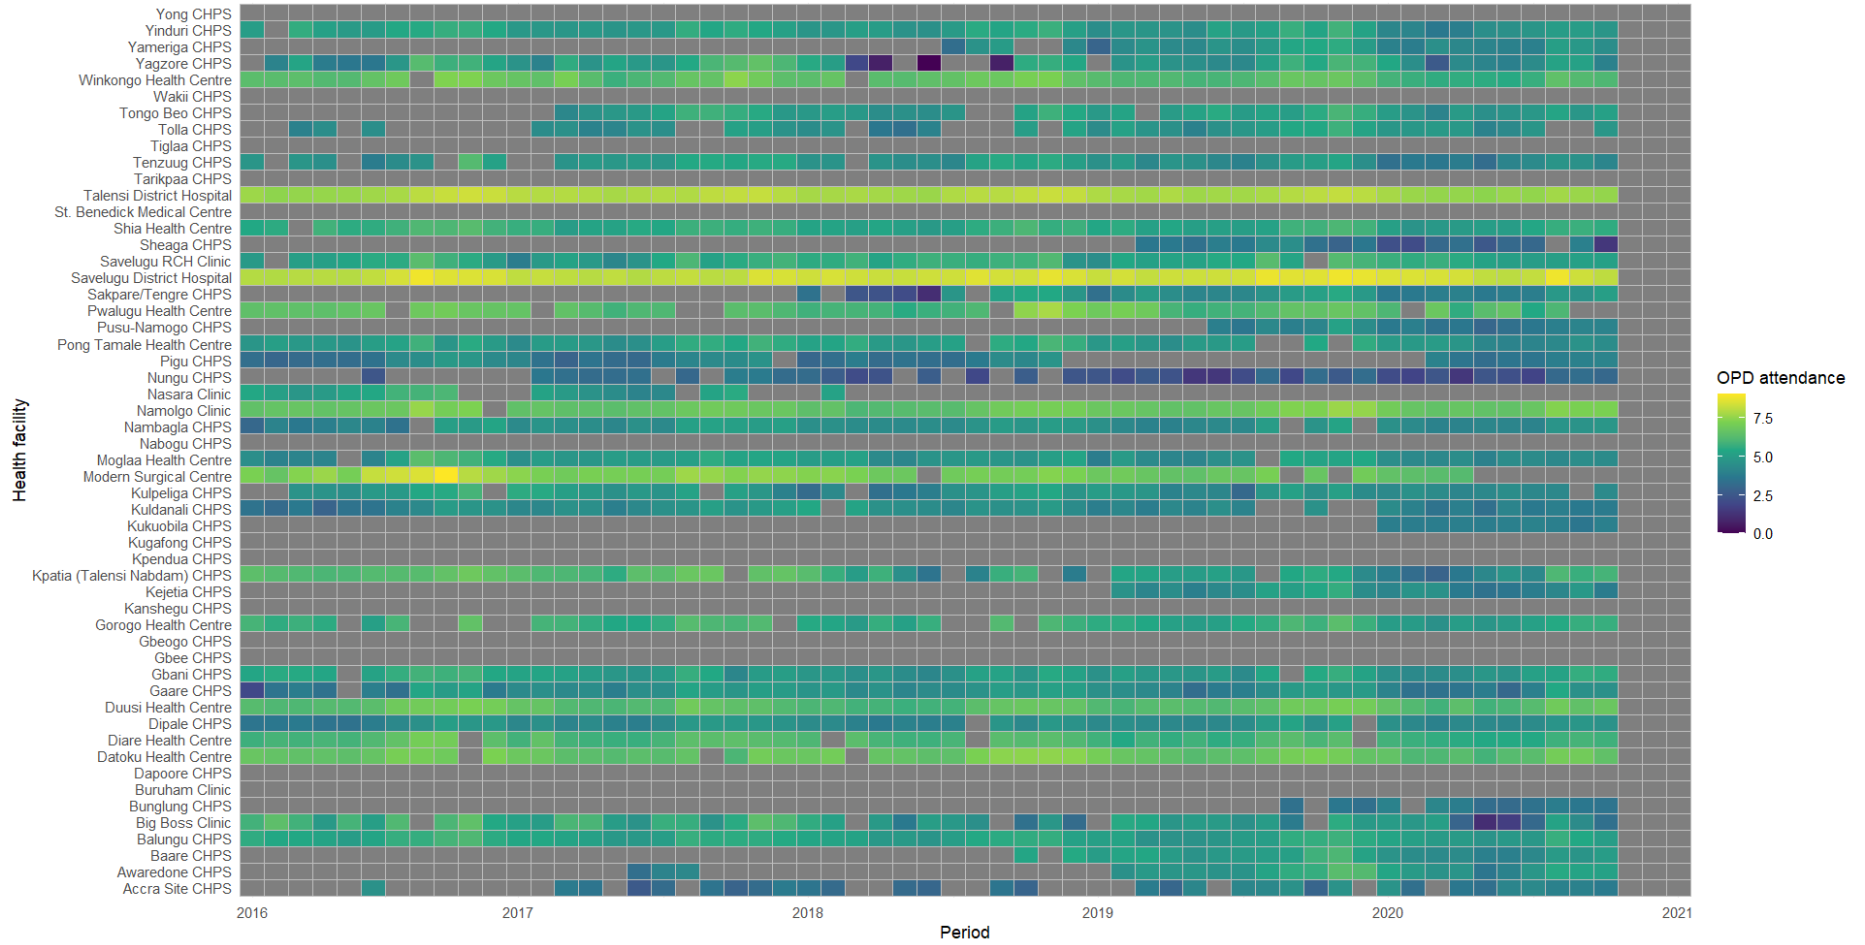

Monthly trend of log of percent flooded area as detected via modis product by health facility from 2016 to 2020

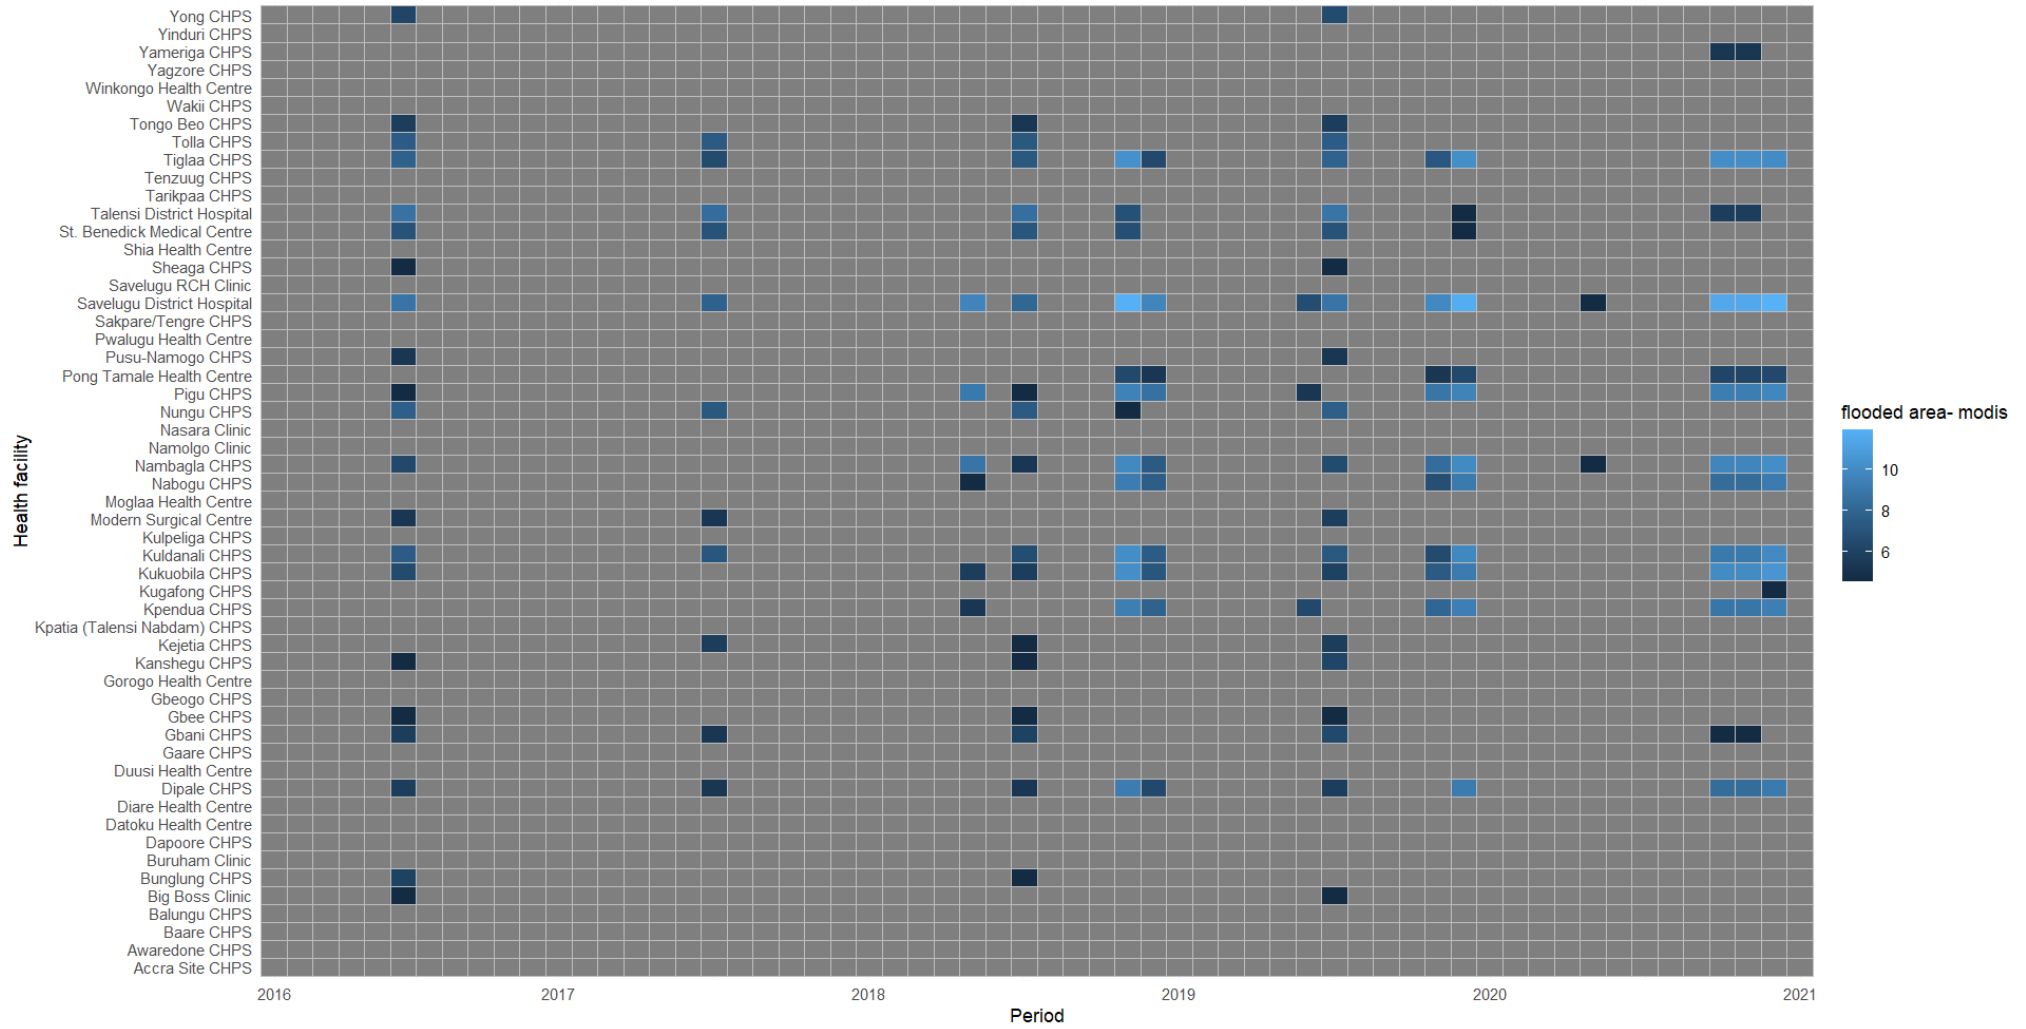

Monthly trend of log of percent flooded area as detected via landsat product by health facility from 2016 to 2020

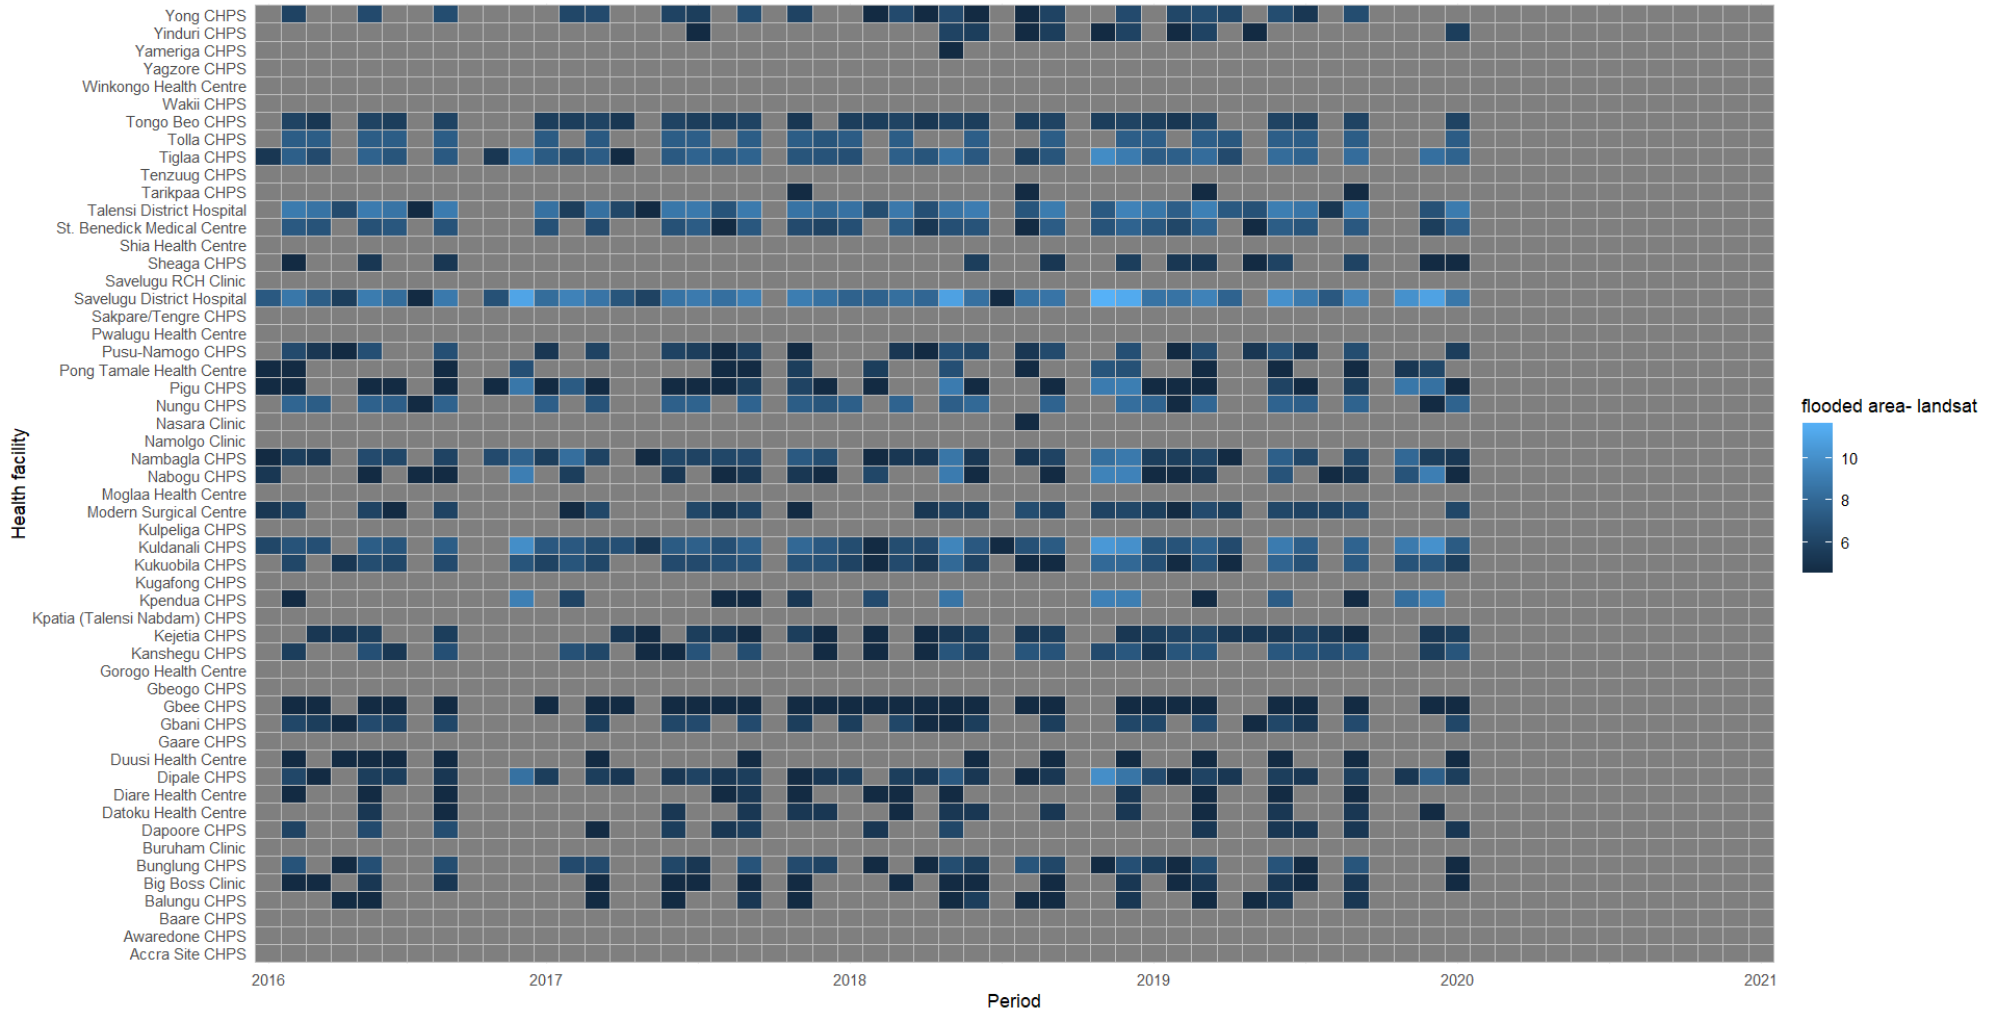

Supplement: MOESM3 [file 23723246]
